# Supplementary material
Source: publisher site journal article supplement (https://www.spandidos-publications.com/5851/downloadSupplementary)

Figure S1. Gel images and Sanger traces for the three SNPs of the X-ray repair cross-complementing group-1 gene. (A) Agarose gel electrophoresis of the PCR product fragments containing SNP rs1799782 (Arg194Trp), rs25489 (Arg280His) and rs25487 (Arg399Gln). (B) Results of Sanger sequencing for the three genotypes of Arg194Trp (CC, CT and TT), Arg280His (GG, GA and AA) and Arg399Gln (GG, GA and AA). The red arrows and boxes indicated the polymorphisms.

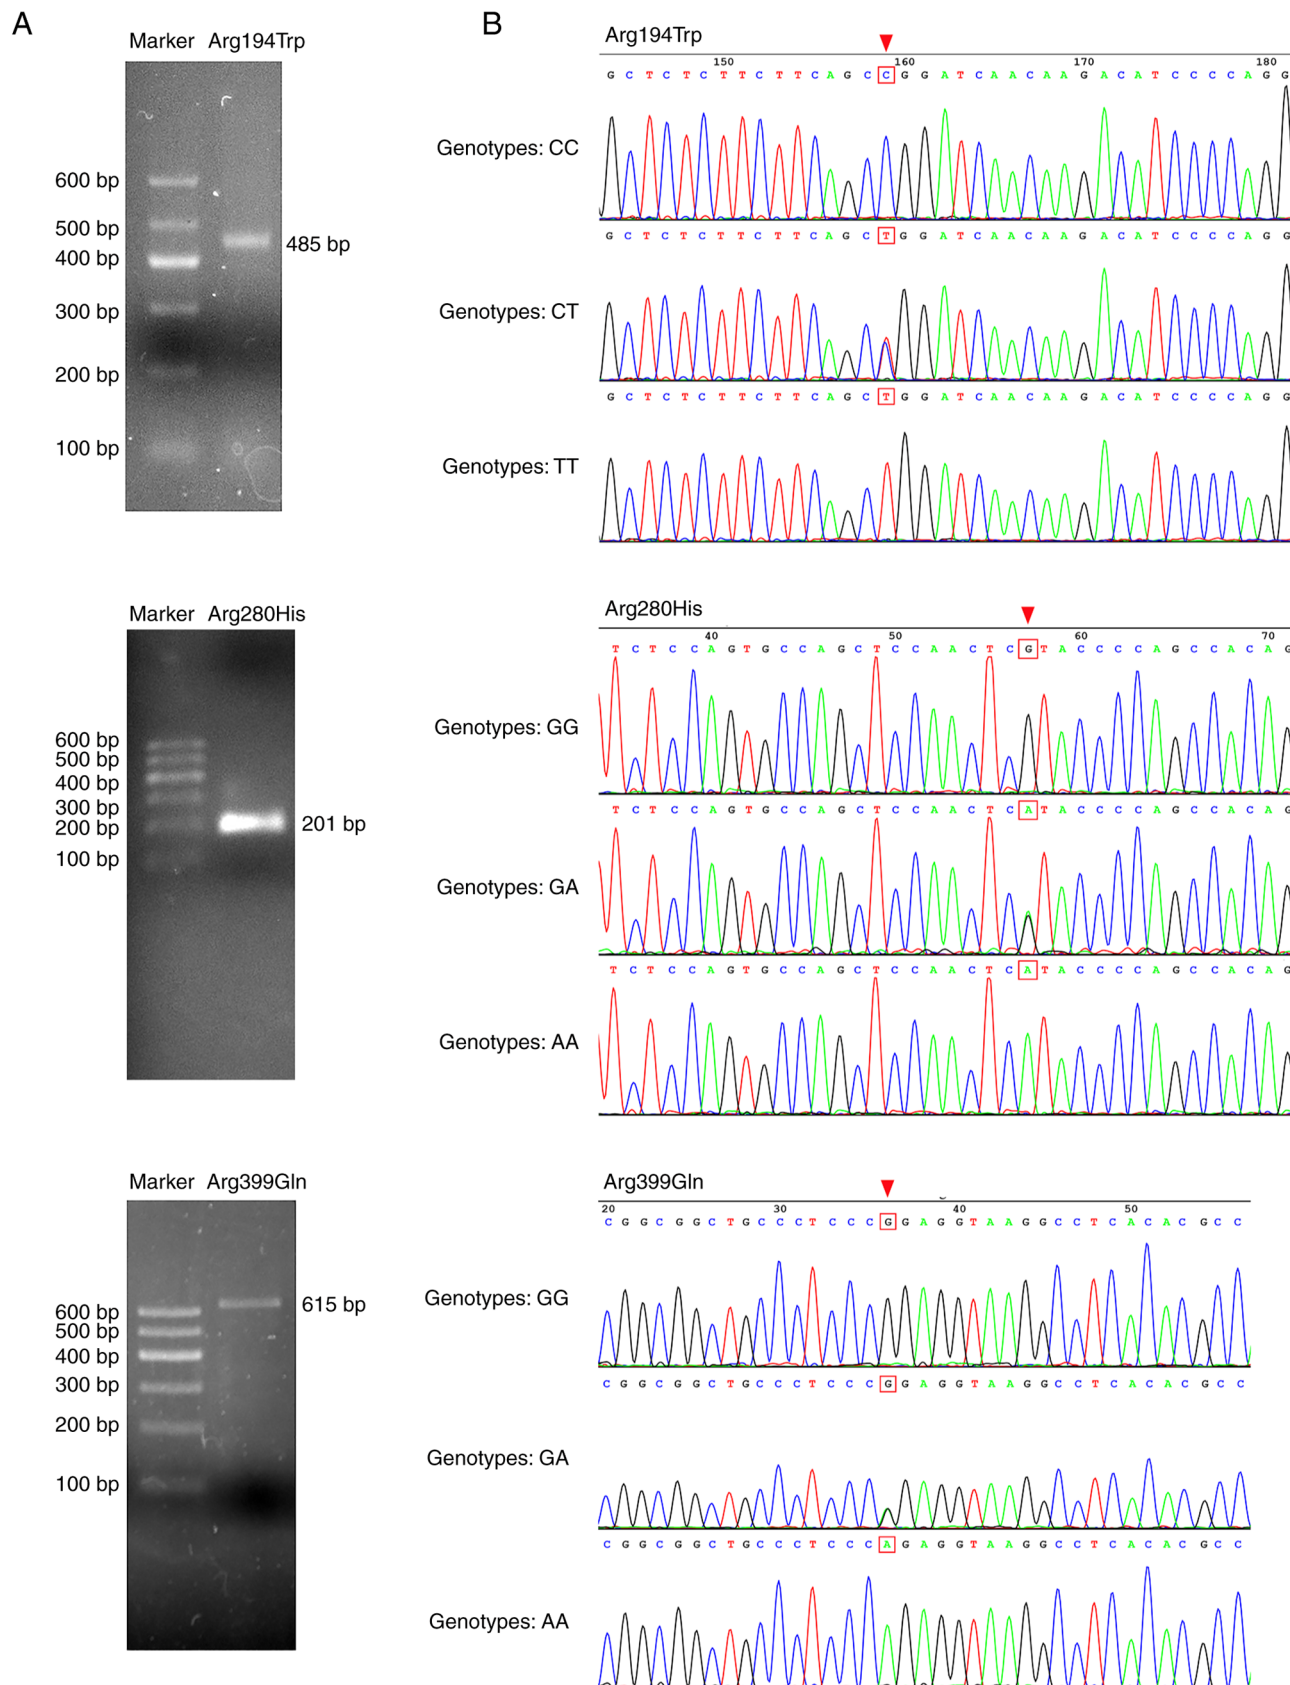

Supplement: Supplementary file 1 [file downloadSupplementary]
